# Supplementary material for: Preparation of thiol-functionalized magnetic sawdust composites as an adsorbent to remove heavy metal ions
Source: Royal Society of Chemistry journal article supplement (doi:10.1039/c6ra02285e), 2016-01-01
Supplement: c6ra02285e1.pdf [file c6ra02285e1.pdf]

## Supporting information

### Preparation of thiol-functionalized magnetic sawdust composites as the adsorbent to remove heavy metal ions

Wentao Gan<sup>1</sup>, Likun Gao<sup>1</sup>, Xianxu Zhan<sup>2</sup>, Jian Li<sup>1\*</sup>

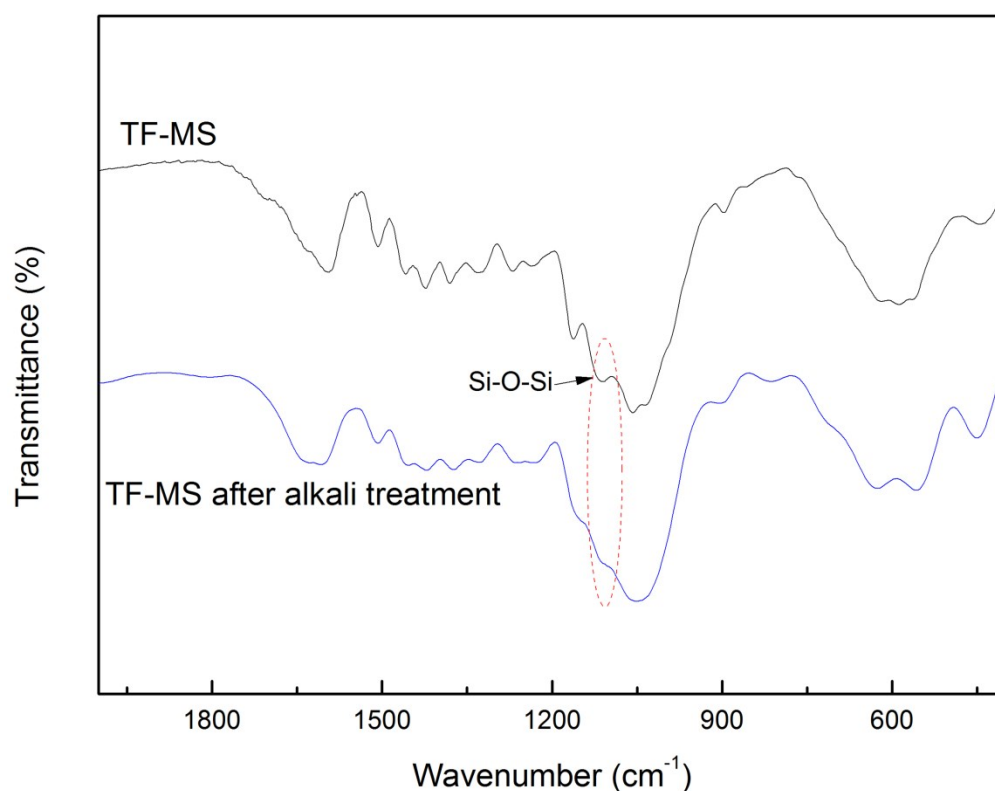

Figure S1 FTIR spectra of TF-MS before and after alkali treatment.

Table S1 Effect of the concentration of iron oxides on t Pb<sup>2+</sup> adsorption.

| Fe <sup>3+</sup> content<br>(mol/L) | Fe <sup>2+</sup> content<br>(mol/L) | Surface area<br>(m <sup>2</sup> /g) | Pore size<br>(d, nm) | Pb <sup>2+</sup> adsorption |
|-------------------------------------|-------------------------------------|-------------------------------------|----------------------|-----------------------------|
| 0.01                                | 0.005                               | 12.13                               | 13.84                | 9.37                        |
| 0.02                                | 0.01                                | 12.51                               | 13.51                | 9.62                        |
| 0.03                                | 0.015                               | 16.75                               | 15.29                | 10.16                       |

Measured using N<sub>2</sub> adsorption with the Brunauer-Emmett-Teller (BET) method. Pore

size in diameter calculated by the desorption data using Barrett-Joyner-Halenda (BJH) method. Pb<sup>2+</sup> adsorption conditions: pH: 6.0; contact time: 30 min; C<sub>0</sub>=10 mg/L; adsorbent concentration: 1 g/L.

Table S2 The list of biomass materials available for adsorption heavy metal ions.

| Adsorbent                   | q <sub>m</sub> (mg/g) |                  |                  | Reference                    |
|-----------------------------|-----------------------|------------------|------------------|------------------------------|
|                             | Cu <sup>2+</sup>      | Pb <sup>2+</sup> | Cd <sup>2+</sup> |                              |
| Maple sawdust               | 1.79                  | 3.19             | -                | Yu et al. 2001               |
| Poplar sawdust              | 2.25                  | -                | 0.50             | Šćiban et al. 2004           |
| Almond shell                | 3.62                  | -                | -                | Altun et al. 2007            |
| Modified peanut husk        | 3.80                  | 4.66             | -                | Li et al. 2007               |
| Abies aschalinensis Masters | 4.4                   | -                | 6.7              | Seki et al. 1997             |
| Black locust                | 4.48                  | -                | -                | Sciban et al. 2006           |
| Pomegranate peel            | 7.2                   | 14.4             | -                | El-Ashtoukhy et al.<br>2008  |
| Bael tree leaf powder       | -                     | 0.328            | -                | Senthil Kumar et al.<br>2009 |
| Sphagnum moss peat          | 12.4                  | 12.3             | -                | Ho et al. 2000               |
| Banana peel                 | -                     | 7.97             | -                | Annadurai et al. 2003        |
| TF-MS                       | 5.49                  | 12.50            | 3.80             | This study                   |
